# Supplementary material for: Solubility of graphene-like two-dimensional layered C3N3
Source: Royal Society of Chemistry journal article supplement (doi:10.1039/d2cc05003j), 2022-01-01
Supplement: d2cc05003j1.pdf [file d2cc05003j1.pdf]

## Support Information

### Experimental

#### Preparation of g-C<sub>3</sub>N<sub>3</sub>

2 g of melamine chloride and a roll of copper foil were placed in a reaction kettle lined with para-polyphenylene (PPL) and then heated at 260°C for 24h.

After the reaction, the polymer generated on the copper foil was scraped off and then washed three times with ethanol and pure water (80°C) in a centrifuge tube and centrifuged. The centrifuged samples were repeatedly washed with HNO<sub>3</sub> solution at a concentration of 10 wt%. The samples were then washed with HCl solution at a concentration of 10 wt%, deionized water and anhydrous ethanol, respectively, by ultrasonication three times in sequence. After drying, the brown product of g-C<sub>3</sub>N<sub>3</sub> obtained [13].

#### Preparation of g-C<sub>3</sub>N<sub>3</sub>/H<sub>2</sub>SO<sub>4</sub> solution

3 g g-C<sub>3</sub>N<sub>3</sub> and 10 ml H<sub>2</sub>SO<sub>4</sub> were mixed and stirred until completely dissolved, and the resulting solution was a dark brown solution. The concentration of protonated g-C<sub>3</sub>N<sub>3</sub> in the dissolved solution was 300 mg·ml<sup>-1</sup>. In all subsequent studies, concentrated sulfuric acid refers to 98 wt% sulfuric acid if not otherwise specified.

#### Preparation of g\*-C<sub>3</sub>N<sub>3</sub> recrystallization

Deionized water was added to the above brown solution until no more crystalline products were precipitated, filtered and then thoroughly washed with deionized water and dried at 60 °C. The product was denoted as g\*-C<sub>3</sub>N<sub>3</sub>.

### Characterizations

The material phase structure was characterized by Shimadzu XRD-6000. The pore structure and specific surface area were characterized by Brunauer-Emmett-Teller (BET, Autosorb-IQ). The elemental valence states were tested by X-ray photoelectron spectroscopy (XPS) (Thermo Scientific Co. Ltd.). Functional groups were tested by Fourier transform infrared spectroscopy (FT-IR, Shimadzu IR Prestige-21). Basic physical properties of materials were tested by UV-Vis (Shimadzu UV-2450) absorption

spectroscopy and photoluminescence (PL, Fluoromax-4, Horiba Jobin Yvon) spectroscopy.

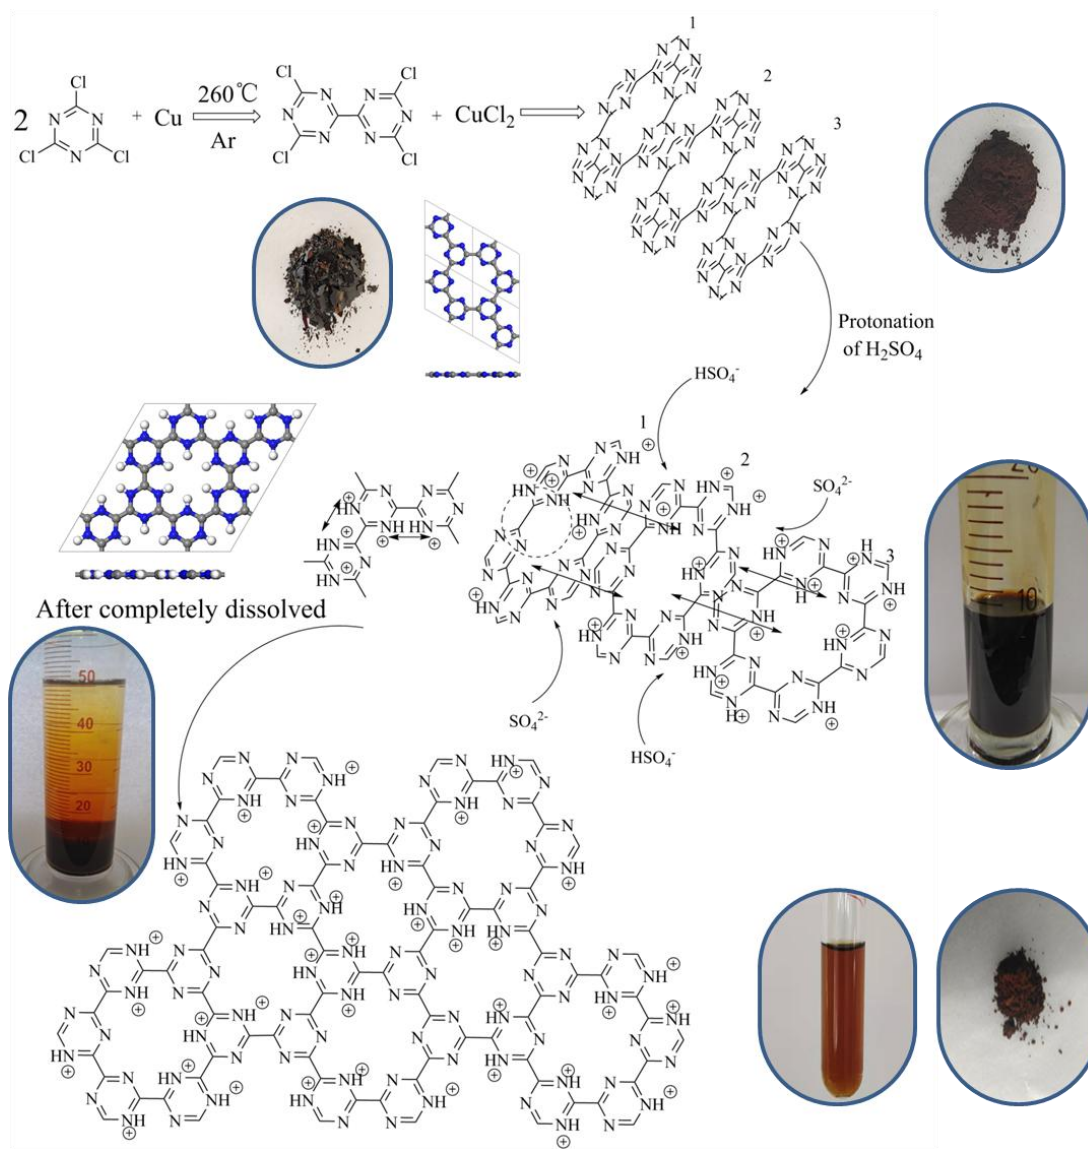

Fig. S1 Schematic diagram of the dissolution process of g-C<sub>3</sub>N<sub>3</sub> in concentrated sulfuric acid

The sulfuric acid used in this work was a concentrated sulfuric acid at 98 wt% concentration. We added the effect of concentration on freezing point, when an additional 10 wt% of deionized water was added, there was no freezing at  $-40^{\circ}\text{C}$  and no precipitation was produced. However, when an additional 20 wt% of deionized water was added, the solution had frozen. See the figure below for details. As shown in the figure below.

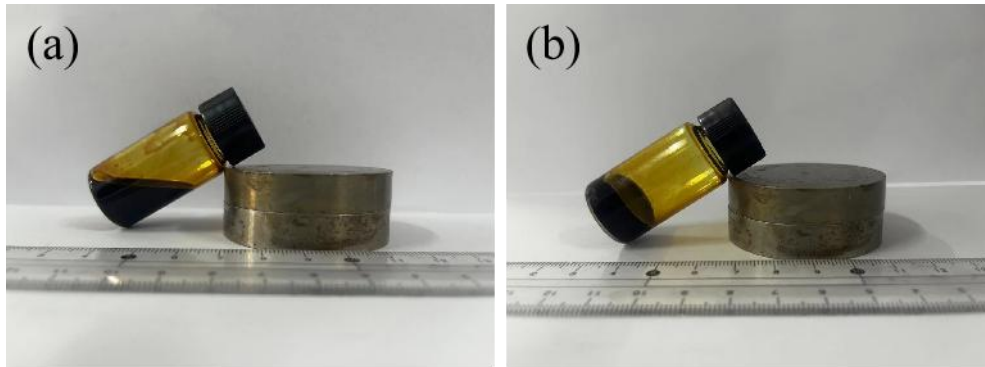

S2 10 wt% (a) and 20 wt% (b) of deionized water was added ( $-40^{\circ}\text{C}$ )
